# Supplementary material for: Emissions of volatile organic compounds from industrial sources and their effects on ozone formation in Wuhan, China
Source: Royal Society of Chemistry journal article supplement (doi:10.1039/d5ea00109a), 2025-11-26
Supplement: d5ea00109a1.pdf [file d5ea00109a1.pdf]

## Supplementary Information

### **Emissions of volatile organic compounds from industrial sources and their effects on ozone formation in Wuhan, China**

Yuhan Xiang,<sup>a</sup> Tianqi Zhang,<sup>a</sup> Yanfen Hao,<sup>a,\*</sup> Beirou Yang,<sup>a</sup> Tiantian Han,<sup>a</sup> Jing Xu,<sup>c</sup> Wenjuan Li,<sup>a</sup> Pu Wang,<sup>a,b</sup> Yong Liang,<sup>a</sup>

<sup>a</sup> *Hubei Key Laboratory of Environmental and Health Effects of Persistent Toxic Substances,  
College of Environment and Health, Jiangnan University, Wuhan, China 430056*

<sup>b</sup> *Hubei Key Laboratory of Industrial Fume & Dust Pollution Control, Jiangnan University,  
Wuhan, China 430056*

<sup>c</sup> *Advanced Interdisciplinary Institute of Environment and Ecology, Beijing Normal University,  
Zhuhai, China 519087*

*\*Corresponding author. E-mail address: Hao\_YF@jhun.edu.cn*

NO. of Tables 6

# content

Table S1 Detail information of nine vehicle-related and seven commodity manufacturing industries.....3

Table S2 Detail Information of the sixteen Sampling Sites .....7

Table S3 OFP values of VOCs analogues emitted from vehicle-related industries 8

Table S4 OFP values of VOCs analogues emitted from commodity manufacturing industries .....9

Table S5 OFP of twenty-seven detectable VOC analogues from nine vehicle-related and seven commodity manufacturing industries .....10

Table S6 The detection concentrations of individual forty-eight VOCs Emitted by sixteen Industries .....12

Table S1 Detail information of nine vehicle-related and seven commodity manufacturing industries

| Factor y | Industry Category                                      | Annual Production Capacity | raw and auxiliary materials that generate VOCs and their production volumes                                                                                                                                                                                               | VOCs-Involved Process (Pollutant Category)                                                                                                 | VOCs Emission during the Production Process (kg) and the Corresponding Year |
|----------|--------------------------------------------------------|----------------------------|---------------------------------------------------------------------------------------------------------------------------------------------------------------------------------------------------------------------------------------------------------------------------|--------------------------------------------------------------------------------------------------------------------------------------------|-----------------------------------------------------------------------------|
| DFFS     | Automobile manufacturing of complete vehicles          | 3,510,000 vehicles         | Water-based 3C1B Compact Coating Line (120,000 units)                                                                                                                                                                                                                     | Industrial coating, Drying (VOCs, Sulfur Dioxide, Nitrogen Oxides, Particulate Matter, Benzene, Toluene, Xylene, Non-Methane Hydrocarbons) | Non-Methane Hydrocarbons<br>2019 : 120                                      |
| DFSC     | Manufacturing of complete gasoline and diesel vehicles | 120000 units               | Electrophoretic primer (632.846 t), Sealant (773.988 t), Paint (298.1 t), Clear coat (116.715 t)                                                                                                                                                                          | Spraying, Drying (VOCs, Particulate Matter, Toluene, Xylene)                                                                               | VOCs<br>2019 : 120212.03<br>2020 : 224066.85                                |
| DFYC     | Manufacturing of complete gasoline and diesel vehicles | 304231 units               | Electrophoretic primer (2263.662 t), Sealant (2560.059 t)<br>Intermediate coating (601.961 t), Paint color (825.397 t), Clear coat (399 t)                                                                                                                                | Spraying, Drying (VOCs, Particulate Matter, Toluene, xylene)                                                                               | VOCs<br>2019 : 407387.6<br>2020 : 189321                                    |
| SLSC     | Manufacturing of complete gasoline and Diesel vehicles | 31889 vehicles             | Electrophoretic pigment slurry (35.848 t), Electrophoretic resin (145.211 t), Electrophoretic solvent (4.6 t), Sealant (78.5 t), Seal PVC coating (61.5 t), Undercoat paint (29.695 t), Paint (109.454 t), Clear coat (40.228 t), Curing agent (15.146 t), Repaired paint | Coating (Non-Methane Hydrocarbons, Toluene, Xylene, Sulfur Dioxide, Nitrogen Oxides, Particulate Matter)                                   | VOCs<br>2019 : 65049<br>2020 : 58272                                        |

|       |                                                                                                          |                                       |                                                                                                                                                             |                                                              |                                              |
|-------|----------------------------------------------------------------------------------------------------------|---------------------------------------|-------------------------------------------------------------------------------------------------------------------------------------------------------------|--------------------------------------------------------------|----------------------------------------------|
|       |                                                                                                          |                                       | (0.032 t), Repaired clear coat (0.04 t),<br>Repaired curing agent (0.009 t),<br>Cleaned butyl acetate (23.267 t),<br>Cleaned water-based solvents (6.847 t) |                                                              |                                              |
| LY    | Manufacturing of automotive parts and accessories                                                        | Bumper 72,800 pieces                  | Thermoplastics and thermosets (1459 t), Undercoat (15.39 t), Paint (49.38 t), Clear coat (38.63 t), Varnish (48.98 t), Cleaning solvent (53.14 t)           | Surface coating (Benzene, Toluene, Xylene)                   | VOCs : 116595                                |
| DFADT | Manufacturing of automotive seat assemblies and related components                                       | 500,000 vehicles                      | Foaming agent, Adhesive, Paint                                                                                                                              | Coating (Benzene, Toluene, Xylene)                           | VOCs                                         |
| DFEC  | Manufacturing of complete gasoline and diesel vehicles                                                   | 319665 units                          | Sealant (2803.56 t), Cathodic electrophoretic paint (2204.82 t), Paint (1062.54 t), Clear coat (374.54 t), Solvent (50.37 t), Cleaning agent (104.68 t)     | Spraying, Drying (VOCs, Particulate Matter, Toluene, Xylene) | VOCs<br>2019 : 452906.89<br>2020 : 182370.69 |
| GM    | Manufacturing of non-metallic interior and exterior trim parts and structural components for automobiles | -                                     | Injection molding raw materials                                                                                                                             | Coating, Welding (Benzene, Toluene, Xylene)                  | VOCs                                         |
| VSKT  | Manufacturing of automobile parts                                                                        | 3 million units of automotive exhaust | Cutting fluid (135 t)                                                                                                                                       | Sand core baking (Non-Methane Hydrocarbons)                  | Non-Methane Hydrocarbons                     |

|      |                                           |                                                       |                                                             |                                                                                                                     |                                                                                                 |
|------|-------------------------------------------|-------------------------------------------------------|-------------------------------------------------------------|---------------------------------------------------------------------------------------------------------------------|-------------------------------------------------------------------------------------------------|
|      |                                           | manifold and turbocharger housing                     |                                                             |                                                                                                                     | 2020 : 0.29mg                                                                                   |
| MXDZ | Electronic circuit manufacturing industry | Rigid printed circuit boards 4,560,000 m <sup>3</sup> | Ink (386.1 t), Cleaning agent, Diluent (70.6 t)             | Printing (Non-Methane Hydrocarbons)                                                                                 | Non-Methane Hydrocarbons<br>2019 : 21590<br>2020 : 14040                                        |
| ZL   | Packaging and Printing industries         | 10 billion cans (Aluminum cans)                       | Clear varnish (194 t), Ink (44 t), Internal coating (575 t) | Color printing drying, Internal coating drying, Gas emission (Non-Methane Hydrocarbons, Formaldehyde)               | Non-Methane Hydrocarbons<br>2019 : 845<br>2020 : 2400<br>Formaldehyde<br>2019 : 134<br>2020 : 0 |
| JC   | Foam plastic manufacturing                | 4000 t                                                | LDPE pellets (3000 t) , Butane (175 t)                      | Extrusion (Non-Methane Hydrocarbons)                                                                                | VOCs<br>2019 : 2100<br>2020 : 1929.6                                                            |
| BD   | Manufacturing of dance equipment          | -                                                     | Coating, Adhesives, Plastic materials                       | Injection molding, Extrusion, Printing, Spray coating, Bonding (Non-Methane Hydrocarbons, Benzene, Toluene, Xylene) | Non-Methane Hydrocarbons                                                                        |
| CLBL | Glass manufacturing industry              | 500,000 t                                             | Ink, Adhesive, Fuel, Sealant, Paint                         | Printing, Interlayer curing, Melting furnace combustion (VOCs, Formaldehyde, Non-Methane Hydrocarbons)              | Non-Methane Hydrocarbons<br>VOCs                                                                |

|     |                                                          |                                                                          |                                                                                                                                                                                                                                                                                  |                                                                                                    |                                        |
|-----|----------------------------------------------------------|--------------------------------------------------------------------------|----------------------------------------------------------------------------------------------------------------------------------------------------------------------------------------------------------------------------------------------------------------------------------|----------------------------------------------------------------------------------------------------|----------------------------------------|
| HB  |                                                          | Steel bridge structure<br>55,000 t                                       | Epoxy primer, Intermediate coating,<br>Topcoat, Benzene-free thinner, Acrylic<br>thinner                                                                                                                                                                                         | Spraying (Xylene)                                                                                  | VOCs<br>31560                          |
| HJL | Packaging decoration<br>and other printing<br>industries | 1.5 million cases of<br>cigarette outer<br>packaging printed<br>products | Alcohol-soluble intaglio ink (333.4 t),<br>Intaglio solvent ink (67 t), Screen<br>printing UV ink (12 t), Offset printing<br>UV ink (22 t), Water-based UV varnish<br>(6.6 t), Ethyl acetate (5 t), Propyl<br>acetate (170 t), Cleaning agent (55 t),<br>Wetting solution (1.5t) | Mixing the ink, Printing,<br>Cleaning (Volatile Organic<br>Compounds, Benzene,<br>Toluene, Xylene) | VOCs<br>2019 : 150220<br>2020 : 109560 |

Table S2 Detail Information of the sixteen Sampling Sites

|       | Temprutture (°C) | Weather       | Wind Direction | Operation Status of nearby Industries |
|-------|------------------|---------------|----------------|---------------------------------------|
| DFFS  | 25~34            | light rain    | Southwest      | In Operation                          |
| DFSC  | 25~34            | light rain    | Southwest      | In Operation                          |
| DFYC  | 25~34            | light rain    | Southwest      | In Operation                          |
| SLSC  | 25~27            | heavy rain    | West           | In Operation                          |
| LY    | 25~33            | moderate rain | South          | In Operation                          |
| DFADT | 25~34            | light rain    | Southwest      | In Operation                          |
| DFEC  | 25~34            | light rain    | Southwest      | In Operation                          |
| GM    | 25~27            | heavy rain    | West           | In Operation                          |
| VSKT  | 25~31            | moderate rain | South          | In Operation                          |
| MXDZ  | 25~34            | light rain    | Southwest      | In Operation                          |
| ZL    | 25~33            | moderate rain | South          | In Operation                          |
| JC    | 25~27            | heavy rain    | West           | In Operation                          |
| BD    | 25~33            | moderate rain | South          | In Operation                          |
| CLBL  | 25~27            | heavy rain    | West           | In Operation                          |
| HB    | 25~27            | heavy rain    | West           | In Operation                          |
| HJL   | 25~31            | moderate rain | South          | In Operation                          |

Table S3 OFP values of VOCs analogues emitted from vehicle-related industries

| VOCs analogous            | Minimum<br>(ug/m <sup>3</sup> ) | Maximum<br>(ug/m <sup>3</sup> ) | Medians<br>(ug/m <sup>3</sup> ) | Average<br>(ug/m <sup>3</sup> ) | Proportion |
|---------------------------|---------------------------------|---------------------------------|---------------------------------|---------------------------------|------------|
| 1,3,5-Trimethylbenzene    | 0.3                             | 260.5                           | 1.0                             | 60.0                            | 27.3%      |
| o-Xylene                  | 2.5                             | 224.5                           | 12.4                            | 54.9                            | 25.0%      |
| 1,2,4-Trimethylbenzene    | 0.1                             | 170.4                           | 5.8                             | 40.2                            | 18.3%      |
| m+p-Xylene                | 0.2                             | 95.7                            | 2.8                             | 17.3                            | 7.9%       |
| sec-Butylbenzene          | 0.1                             | 59.0                            | 4.4                             | 15.6                            | 7.1%       |
| 2-Chlorotoluene           | 0.4                             | 53.7                            | 7.8                             | 14.1                            | 6.4%       |
| p-Cymene                  | <0.1                            | 53.9                            | 0.8                             | 10.5                            | 4.8%       |
| tert-Butylbenzene         | <0.1                            | 6.3                             | 0.7                             | 2.2                             | 1.0%       |
| Isopropylbenzene          | <0.1                            | 9.5                             | 0.2                             | 1.6                             | 0.7%       |
| Butylbenzene              | <0.1                            | 4.8                             | 0.4                             | 1.3                             | 0.6%       |
| trans-1,3-Dichloropropene | 0.3                             | 3.8                             | 0.7                             | 1.3                             | 0.6%       |
| Styrene                   | <0.1                            | 3.4                             | 0.1                             | 0.7                             | 0.3%       |
| Benzene                   | <0.1                            | 0.3                             | <0.1                            | 0.1                             | <0.1%      |
| cis-1,3-Dichloropropene   | <0.1                            | 0.1                             | <0.1                            | <0.1                            | <0.1%      |
| 1,1,2-Trichloroethane     | <0.1                            | 0.1                             | <0.1                            | <0.1                            | <0.1%      |
| 1,2-Dichloropropane       | <0.1                            | 0.1                             | <0.1                            | <0.1                            | <0.1%      |
| Propylbenzene             | <0.1                            | 0.1                             | <0.1                            | <0.1                            | <0.1%      |
| 1,1-Dichloroethene        | <0.1                            | <0.1                            | <0.1                            | <0.1                            | <0.1%      |
| Tetrachloroethene         | <0.1                            | <0.1                            | <0.1                            | <0.1                            | <0.1%      |
| Total                     | 5.3                             | 646.8                           | 55.9                            | 219.7                           | □          |



Table S4 OFP values of VOCs analogues emitted from commodity manufacturing industries

| VOCs analogous            | Minimum<br>(ug/m <sup>3</sup> ) | Maximum<br>(ug/m <sup>3</sup> ) | Medians<br>(ug/m <sup>3</sup> ) | Average<br>(ug/m <sup>3</sup> ) | Proportion |
|---------------------------|---------------------------------|---------------------------------|---------------------------------|---------------------------------|------------|
| trans-1,3-Dichloropropene | <0.1                            | 14.5                            | 0.5                             | 3.1                             | 42.2%      |
| o-Xylene                  | 0.6                             | 5.8                             | 1.7                             | 2.6                             | 36.4%      |
| 1,3,5-Trimethylbenzene    | <0.1                            | 1.0                             | 0.5                             | 0.5                             | 6.3%       |
| m+p-Xylene                | <0.1                            | 1.1                             | 0.2                             | 0.4                             | 4.8%       |
| Butylbenzene              | <0.1                            | 1.4                             | <0.1                            | 0.2                             | 2.7%       |
| 1,2,4-Trimethylbenzene    | <0.1                            | 0.5                             | 0.1                             | 0.2                             | 2.4%       |
| 2-Chlorotoluene           | <0.1                            | 0.5                             | <0.1                            | 0.2                             | 2.1%       |
| sec-Butylbenzene          | <0.1                            | 0.3                             | 0.1                             | 0.1                             | 1.7%       |
| tert-Butylbenzene         | <0.1                            | 0.4                             | <0.1                            | 0.1                             | 0.8%       |
| Benzene                   | <0.1                            | 0.1                             | <0.1                            | <0.1                            | 0.5%       |
| Isopropylbenzene          | <0.1                            | <0.1                            | <0.1                            | <0.1                            | 0.1%       |
| 1,1-Dichloroethene        | <0.1                            | <0.1                            | <0.1                            | <0.1                            | <0.1%      |
| 1,1,2-Trichloroethane     | <0.1                            | <0.1                            | <0.1                            | <0.1                            | <0.1%      |
| Tetrachloroethene         | <0.1                            | <0.01                           | <0.1                            | <0.1                            | <0.1%      |
| Total                     | 1.1                             | 17.4                            | 4.2                             | 7.3                             | □          |

Table S5 OFP of twenty-seven detectable VOC analogues from nine vehicle-related and seven commodity manufacturing industries

| VOCs analogous              | DFFS | DFSC  | DFYC | SLSC  | LY    | DFADT | DFEC | GM    | VSKT | MXDZ | ZL   | JC   | BD   | CLBL | HB   | HJL  |
|-----------------------------|------|-------|------|-------|-------|-------|------|-------|------|------|------|------|------|------|------|------|
| 0-Xylene                    | 4.9  | 27.9  | 12.4 | 36.1  | 176.9 | 2.5   | 5.1  | 224.5 | 3.9  | 1.4  | 5.8  | 0.6  | 1.7  | 1.6  | 2.4  | 4.9  |
| sec-Butylbenzene            | 1.1  | 38.8  | 4.4  | 28.9  | 59.0  | 0.1   | 0.4  | 7.0   | 0.6  | 0.2  | 0.1  | <0.1 | -    | 0.1  | 0.1  | 0.3  |
| 1,3,5-Trimethylbenzene      | 21.8 | 4.2   | 0.3  | 1.0   | 249.7 | 1.0   | 0.6  | 260.5 | 1.0  | 0.1  | 1.0  | -    | 0.8  | -    | 0.5  | 0.7  |
| 1,2,4-Trimethylbenzene      | 5.8  | 170.4 | 21.6 | 127.0 | 1.1   | 0.1   | 1.9  | 31.7  | 2.5  | 0.1  | -    | -    | -    | 0.4  | 0.5  | 0.2  |
| p-Cymene                    | 0.8  | 53.9  | 4.2  | 29.6  | -     | -     | 0.4  | 4.8   | 0.6  | -    | -    | -    | -    | -    | -    | -    |
| m+p-Xylene                  | 0.7  | 4.0   | 2.8  | 7.8   | 42.7  | 0.2   | 1.1  | 95.7  | 0.3  | 0.2  | 0.6  | <0.1 | 0.1  | 0.2  | 0.3  | 1.1  |
| tert-Butylbenzene           | 0.1  | 6.1   | 0.7  | 6.3   | 4.7   | -     | -    | 1.4   | -    | -    | -    | -    | -    | -    | -    | 0.4  |
| Isopropylbenzene            | <0.1 | 0.8   | 0.2  | 0.9   | 9.5   | 0.2   | 0.1  | 2.7   | -    | <0.1 | <0.1 | <0.1 | -    | -    | <0.1 | -    |
| Butylbenzene                | 0.1  | 4.8   | 0.4  | 3.0   | 2.8   | -     | -    | 0.4   | -    | 1.4  | -    | -    | -    | -    | -    | -    |
| Styrene                     | <0.1 | 0.2   | 0.1  | 0.3   | 3.4   | -     | <0.1 | 1.9   | -    | -    | -    | -    | -    | -    | -    | -    |
| Benzene                     | <0.1 | <0.1  | <0.1 | 0.1   | <0.1  | 0.3   | 0.1  | <0.1  | <0.1 | <0.1 | 0.1  | 0.1  |      | <0.1 | <0.1 | <0.1 |
| Propylbenzene               | -    | 0.1   | -    | -     | -     | -     | -    | -     | -    | -    | -    | -    | -    | -    | -    | -    |
| 2-Chlorotoluene             | 1.5  | 53.7  | 7.7  | 31.5  | 16.2  | 0.4   | 0.7  | 14.3  | 1.1  | -    | 0.5  | -    | 0.3  | <0.1 | -    | 0.3  |
| 1,2,3-Trichlorobenzene      | -    | -     | -    | -     | -     | -     | -    | -     | -    | -    | -    | -    | -    | -    | -    | -    |
| 1,2,3-Trichloropropane      | -    | -     | -    | -     | -     | -     | -    | -     | -    | -    | -    | -    | -    | -    | -    | -    |
| 1,2-Dibromo-3-chloropropane | -    | -     | -    | -     | -     | -     | -    | -     | -    | -    | -    | -    | -    | -    | -    | -    |
| Bromodichloromethane        | -    | -     | -    | -     | -     | -     | -    | -     | -    | -    | -    | -    | -    | -    | -    | -    |
| 1,1-Dichloroethene          | -    | -     | <0.1 | <0.1  | <0.1  | -     | -    | -     | -    | <0.1 | -    | -    | -    | <0.1 | <0.1 | <0.1 |
| 1,2-Dichloropropane         | -    | -     | -    | -     | -     | -     | -    | 0.1   | -    | -    | -    | -    | -    | -    | -    | -    |
| 1,1,2-Trichloroethane       | <0.1 | <0.1  | -    | 0.1   | -     | <0.1  | <0.1 | <0.1  | -    | <0.1 | -    | -    | -    | -    | -    | -    |
| 1,1,2,2-Tetrachloroethane   | -    | -     | -    | -     | -     | -     | -    | -     | -    | -    | -    | -    | -    | -    | -    | -    |
| trans-1,3-Dichloropropene   | 0.3  | 0.4   | 1.2  | 0.7   | 2.3   | 0.5   | 0.5  | 1.7   | 3.8  | -    | 4.9  | 0.3  | 14.5 | 0.5  | 0.4  | 0.8  |

|                          |      |      |      |      |      |   |      |      |      |      |      |      |      |      |      |      |
|--------------------------|------|------|------|------|------|---|------|------|------|------|------|------|------|------|------|------|
| Tetrachloroethene        | <0.1 | <0.1 | <0.1 | <0.1 | <0.1 | - | <0.1 | <0.1 | <0.1 | <0.1 | <0.1 | <0.1 | <0.1 | <0.1 | <0.1 | <0.1 |
| Hexachloro-1,3-butadiene | -    | -    | -    | -    | -    | - | -    | -    | -    | -    | -    | -    | -    | -    | -    | -    |
| 1,1-Dichloropropene      | -    | -    | -    | -    | -    | - | -    | -    | -    | -    | -    | -    | -    | -    | -    | -    |
| cis-1,3-Dichloropropene  | -    | -    | -    | -    | 0.1  | - | 0.1  | -    | -    | -    | -    | -    | -    | -    | -    | -    |
| Chlorodibromomethane     | -    | -    | -    | -    | -    | - | -    | -    | -    | -    | -    | -    | -    | -    | -    | -    |

Table S6 The detection concentrations of individual forty-eight VOCs Emitted by sixteen Industries

| Test Item                 | DFFS  | DFSC  | DFYC  | SLSC  | LY    | DFAD<br>T | DFEC  | GM    | VSKT  | MXD<br>Z | ZL    | JC    | BD    | CLBL  | HB    | HJL   |
|---------------------------|-------|-------|-------|-------|-------|-----------|-------|-------|-------|----------|-------|-------|-------|-------|-------|-------|
| trans-1,2-Dichloroethene  | n.d.  | n.d.  | n.d.  | n.d.  | n.d.  | n.d.      | n.d.  | n.d.  | n.d.  | n.d.     | n.d.  | n.d.  | n.d.  | n.d.  | n.d.  | n.d.  |
| 1,1-Dichloroethene        | n.d.  | n.d.  | <0.01 | <0.01 | 0.60  | n.d.      | n.d.  | n.d.  | n.d.  | <0.01    | n.d.  | n.d.  | n.d.  | <0.01 | <0.01 | 0.20  |
| cis-1,2-Dichloroethane    | n.d.  | n.d.  | n.d.  | n.d.  | n.d.  | n.d.      | n.d.  | n.d.  | n.d.  | n.d.     | n.d.  | n.d.  | n.d.  | n.d.  | n.d.  | n.d.  |
| Bromochloroethene         | n.d.  | n.d.  | n.d.  | n.d.  | n.d.  | n.d.      | n.d.  | n.d.  | n.d.  | n.d.     | n.d.  | n.d.  | n.d.  | n.d.  | n.d.  | n.d.  |
| Chloroform                | n.d.  | n.d.  | n.d.  | n.d.  | n.d.  | n.d.      | n.d.  | n.d.  | n.d.  | n.d.     | n.d.  | n.d.  | n.d.  | n.d.  | n.d.  | n.d.  |
| 1,1,1-Trichloroethene     | n.d.  | n.d.  | n.d.  | n.d.  | n.d.  | n.d.      | n.d.  | n.d.  | n.d.  | n.d.     | n.d.  | n.d.  | n.d.  | n.d.  | n.d.  | n.d.  |
| 1,1-Dichloropropene       | n.d.  | n.d.  | n.d.  | <0.01 | n.d.  | n.d.      | n.d.  | 0.10  | n.d.  | n.d.     | n.d.  | n.d.  | 0.10  | n.d.  | n.d.  | n.d.  |
| 1,2-Dichloroethene        | n.d.  | n.d.  | n.d.  | n.d.  | n.d.  | n.d.      | n.d.  | n.d.  | n.d.  | n.d.     | n.d.  | n.d.  | n.d.  | n.d.  | n.d.  | n.d.  |
| Benzene                   | <0.01 | <0.01 | <0.01 | 0.10  | <0.01 | 0.40      | 0.10  | <0.01 | <0.01 | <0.01    | 0.10  | 0.10  | n.d.  | <0.01 | <0.01 | 0.10  |
| Trichloroethene           | n.d.  | n.d.  | n.d.  | n.d.  | n.d.  | n.d.      | n.d.  | n.d.  | n.d.  | n.d.     | n.d.  | n.d.  | n.d.  | n.d.  | n.d.  | n.d.  |
| 1,2-Dichloropropane       | n.d.  | n.d.  | n.d.  | n.d.  | n.d.  | n.d.      | n.d.  | 0.40  | n.d.  | n.d.     | n.d.  | n.d.  | n.d.  | n.d.  | n.d.  | n.d.  |
| Methylene_bromide         | n.d.  | n.d.  | n.d.  | n.d.  | n.d.  | n.d.      | n.d.  | n.d.  | n.d.  | n.d.     | n.d.  | n.d.  | n.d.  | n.d.  | n.d.  | n.d.  |
| Bromodichloromethane      | n.d.  | n.d.  | <0.01 | n.d.  | n.d.  | n.d.      | n.d.  | 0.50  | n.d.  | 0.60     | n.d.  | n.d.  | <0.01 | n.d.  | n.d.  | n.d.  |
| cis-1,3-Dichloropropene   | n.d.  | n.d.  | n.d.  | n.d.  | <0.01 | n.d.      | <0.01 | n.d.  | n.d.  | n.d.     | n.d.  | n.d.  | n.d.  | n.d.  | n.d.  | n.d.  |
| Toluene                   | n.d.  | n.d.  | n.d.  | n.d.  | n.d.  | n.d.      | n.d.  | n.d.  | n.d.  | n.d.     | n.d.  | n.d.  | n.d.  | n.d.  | n.d.  | n.d.  |
| trans-1,3-Dichloropropene | 0.10  | 0.10  | 0.20  | 0.10  | 0.50  | 0.10      | 0.10  | 0.30  | 0.70  | n.d.     | 1.00  | <0.01 | 2.90  | 0.10  | 0.10  | 0.20  |
| 1,1,2-Trichloroethane     | <0.01 | <0.01 | n.d.  | 1.50  | n.d.  | <0.01     | 0.30  | 0.10  | n.d.  | 0.10     | n.d.  | n.d.  | n.d.  | n.d.  | n.d.  | n.d.  |
| 1,3-Dichloropropane       | n.d.  | n.d.  | n.d.  | n.d.  | n.d.  | n.d.      | n.d.  | n.d.  | n.d.  | n.d.     | n.d.  | n.d.  | n.d.  | n.d.  | n.d.  | n.d.  |
| Tetrachloroethene         | <0.01 | <0.01 | <0.01 | <0.01 | <0.01 | n.d.      | <0.01 | <0.01 | <0.01 | <0.01    | <0.01 | <0.01 | <0.01 | <0.01 | <0.01 | <0.01 |
| Chlorodibromomethan       | n.d.  | n.d.  | n.d.  | n.d.  | n.d.  | n.d.      | <0.01 | n.d.  | n.d.  | n.d.     | n.d.  | n.d.  | n.d.  | n.d.  | n.d.  | n.d.  |

|                           |       |       |       |       |       |       |       |       |       |       |       |       |       |       |       |       |
|---------------------------|-------|-------|-------|-------|-------|-------|-------|-------|-------|-------|-------|-------|-------|-------|-------|-------|
| e                         |       |       |       |       |       |       |       |       |       |       |       |       |       |       |       |       |
| 1,2-Diromoethane          | n.d.  |
| Chlorobenzene             | n.d.  |
| 1,1,1,2-Tetrachloroethane | n.d.  |
| Ethylbenzene              | n.d.  |
| m+p-Xylene                | 0.10  | 0.50  | 0.40  | 1.00  | 5.50  | <0.01 | 0.10  | 12.30 | <0.01 | <0.01 | 0.10  | <0.01 | <0.01 | <0.01 | <0.01 | 0.10  |
| 0-Xylene                  | 0.60  | 3.70  | 1.60  | 4.70  | 23.20 | 0.30  | 0.70  | 29.40 | 0.50  | 0.20  | 0.80  | 0.10  | 0.20  | 0.20  | 0.30  | 0.60  |
| Styrene                   | <0.01 | 0.10  | <0.01 | 0.20  | 2.00  | n.d.  | <0.01 | 1.10  | n.d.  |
| Bromoform                 | n.d.  |
| Isopropylbenzene          | <0.01 | 0.30  | 0.10  | 0.40  | 3.80  | 0.10  | <0.01 | 1.10  | n.d.  | <0.01 | <0.01 | <0.01 | n.d.  | n.d.  | <0.01 | n.d.  |
| 1,1,2,2-Tetracholoethane  | n.d.  | n.d.  | n.d.  | n.d.  | n.d.  | n.d.  | 0.10  | <0.01 | n.d.  | n.d.  | n.d.  | 0.10  | n.d.  | n.d.  | n.d.  | n.d.  |
| Bromobenzene              | n.d.  |
| 1,2,3-Trichloropropane    | 0.40  | 0.40  | 19.00 | 25.20 | 0.70  | n.d.  | n.d.  | 0.20  | <0.01 | 0.30  | 17.50 | n.d.  | <0.01 | n.d.  | n.d.  | <0.01 |
| Propylbenzene             | n.d.  | 0.10  | n.d.  |
| 2-Chlorotoluene           | 0.50  | 18.40 | 2.70  | 10.80 | 5.50  | 0.10  | 0.20  | 4.90  | 0.40  | n.d.  | 0.20  | n.d.  | 0.10  | <0.01 | n.d.  | 0.10  |
| 1,3,5-Trimethylbenzene    | 1.90  | 0.40  | <0.01 | 0.10  | 21.20 | 0.10  | <0.01 | 22.20 | 0.10  | <0.01 | 0.10  | n.d.  | 0.10  | n.d.  | <0.01 | 0.10  |
| tert-Butylbenzene         | 0.10  | 3.10  | 0.40  | 3.30  | 2.40  | n.d.  | n.d.  | 0.70  | n.d.  | 0.20  |
| 1,2,4-Trimethylbenzene    | 0.70  | 19.20 | 2.40  | 14.30 | 0.10  | <0.01 | 0.20  | 3.60  | 0.30  | <0.01 | n.d.  | n.d.  | n.d.  | 0.10  | 0.10  | <0.01 |
| sec-Butylbenzene          | 0.50  | 16.50 | 1.90  | 12.30 | 25.00 | <0.01 | 0.20  | 3.00  | 0.20  | 0.10  | <0.01 | <0.01 | n.d.  | 0.10  | <0.01 | 0.10  |
| 1,3-Dichlorobenzene       | n.d.  |
| p-Cymene                  | 0.20  | 12.10 | 0.90  | 6.70  | n.d.  | n.d.  | 0.10  | 1.10  | 0.10  | n.d.  |
| 1,4-Dichlorobenzene       | n.d.  |
| 1,2-Dichlorobenzene       | n.d.  |

|                             |       |      |      |      |      |      |      |      |      |      |      |      |      |      |      |      |
|-----------------------------|-------|------|------|------|------|------|------|------|------|------|------|------|------|------|------|------|
| Butylbenzene                | <0.01 | 2.20 | 0.20 | 1.30 | 1.30 | n.d. | n.d. | 0.20 | n.d. | 0.60 | n.d. | n.d. | n.d. | n.d. | n.d. | n.d. |
| 1,2-Dibromo-3-chloropropane | n.d.  | 0.90 | n.d. | 0.70 | 7.90 | n.d. | n.d. | 0.20 | n.d. |
| 1,2,4-Trichlorobenzene      | n.d.  | n.d. | n.d. | n.d. | n.d. | n.d. | n.d. | n.d. | n.d. | n.d. | n.d. | n.d. | n.d. | n.d. | n.d. | n.d. |
| Hexachloro-1,3-butadiene    | n.d.  | n.d. | n.d. | n.d. | n.d. | n.d. | n.d. | n.d. | n.d. | n.d. | 0.20 | n.d. | n.d. | n.d. | n.d. | n.d. |
| Naphthalene                 | n.d.  | n.d. | n.d. | n.d. | n.d. | n.d. | n.d. | n.d. | n.d. | n.d. | n.d. | n.d. | n.d. | n.d. | n.d. | n.d. |
| 1,2,3-Trichlorobenzene      | n.d.  | n.d. | n.d. | n.d. | 0.10 | n.d. | 0.10 |
